# Supplementary material for: Clinical efficacy and safety of palliative esophageal stenting without fluoroscopy: a systematic review and meta-analysis
Source: PubMed Central journal article supplement — Endosc Int Open. 2020 Jun 16;8(7):E944–52. doi: 10.1055/a-1164-6398 (PMC7297607; doi:10.1055/a-1164-6398), 2020-06-16
Supplement: 1836supmat-10-1055-a-1164-6398.pdf [file 1836supmat-10-1055-a-1164-6398.pdf]

## SUPPLEMENTARY MATERIALS

### **CLINICAL EFFICACY AND SAFETY OF PALLIATIVE ESOPHAGEAL STENTING WITHOUT FLUOROSCOPY - A SYSTEMATIC REVIEW & META-ANALYSIS**

Saurabh Chandan, Babu P Mohan, Shahab R. Khan, Neil Bhogal, Andrew Canakis, Mohammad Bilal, Amaninder S. Dhaliwal, Muhammad Aziz, Harmeet S. Mashiana, Shailender Singh, Wade Lee-Smith, Suresh Ponnada, Ishfaq Bhat, Douglas Pleskow

#### SUPPLEMENTARY MATERIALS LEGEND

**Supplementary Fig. S1** Forest plot, stent migration.

**Supplementary Fig. S2** Forest plot, tumor overgrowth.

**Supplementary Fig. S3** Forest plot, perforation.

**Supplementary Fig. S4** Funnel plot for publication bias.

**Appendix A** Literature search strategy.

**Appendix B** MOOSE checklist.

Supplementary Fig. S1 Forest plot, stent migration.

### Pooled stent migration

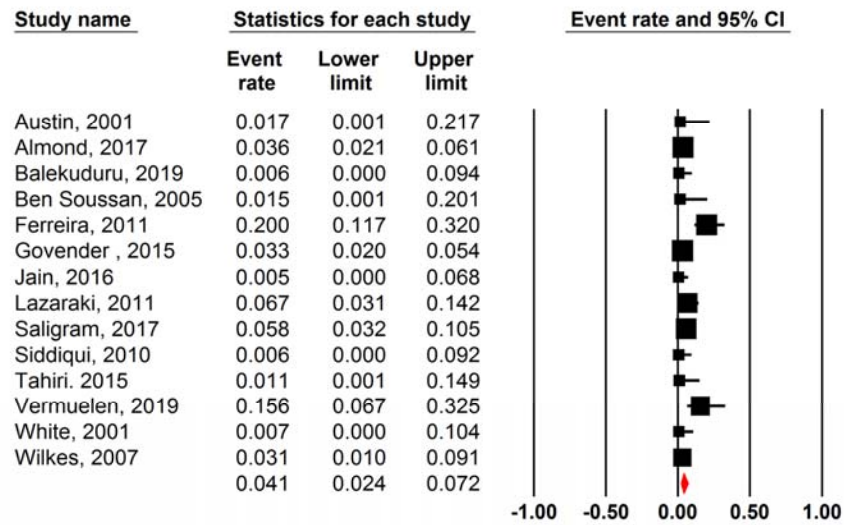

Meta Analysis

Supplementary Fig. S2 Forest plot, tumor overgrowth.

### Pooled tumor overgrowth

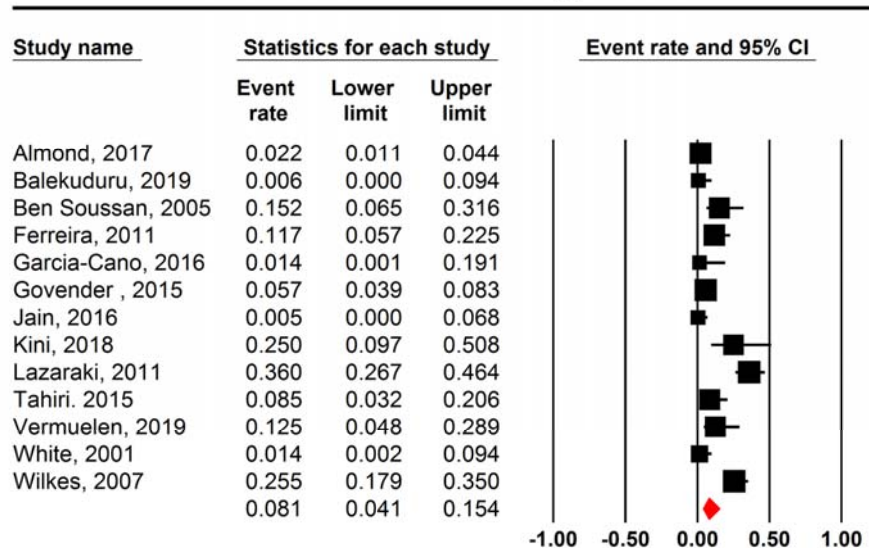

Meta Analysis

Supplementary Fig. S3 Forest plot, perforation.

### Pooled perforation

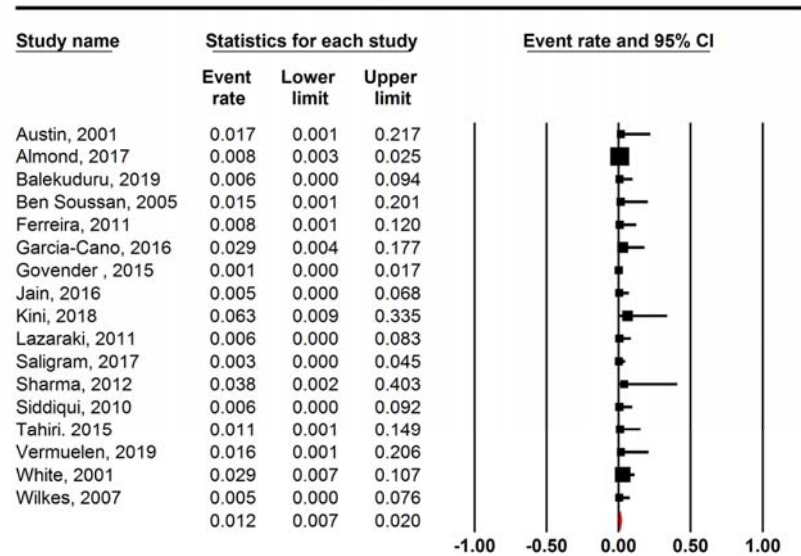

Meta Analysis

Supplementary Fig. S4 Funnel plot for publication bias.

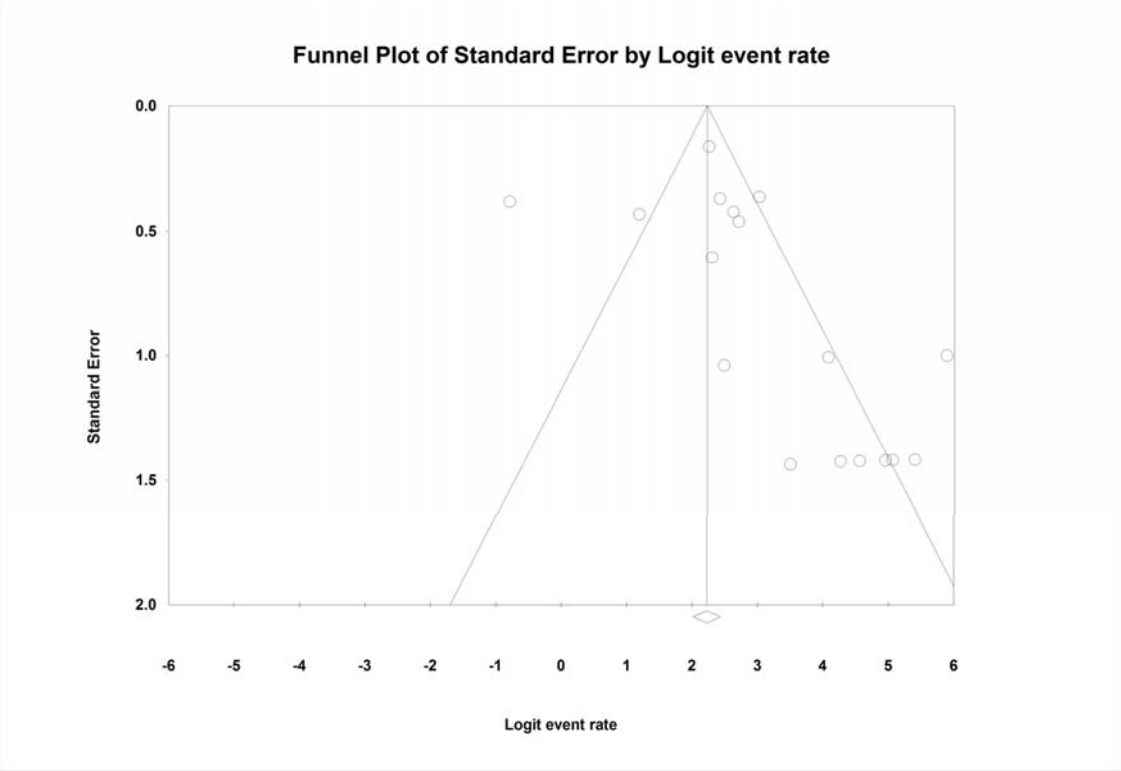

## Appendix A Literature search strategy.

Malignant-dysphagia\* OR ((aphagopraxia\* OR deglutition-disorder\* OR dysphagia\* OR swallowing-disorder\* ) AND (esophagus-cancer\* OR esophagus-neoplasm\* OR esophageal-cancer\* OR esophageal-neoplasm\*))

AND

Esophag\*

AND

Stent\*

AND

Fluoroscop\* OR direct-endoscopic-vis\* OR direct-endoscopic-place\* OR direct-endoscopic-control\*

-----

Malignant-dysphagia\* OR ((aphagopraxia\* OR deglutition-disorder\* OR dysphagia\* OR swallowing-disorder\* OR 'dysphagia'/de) AND (esophagus-cancer\* OR esophagus-neoplasm\* OR esophageal-cancer\* OR esophageal-neoplasm\* OR 'esophagus cancer'/exp))

AND

Esophag\* OR 'esophagus disease'/exp OR 'esophagus'/exp

AND

Stent\* OR 'esophageal stent'/exp

AND

Fluoroscop\* OR 'fluoroscopy'/exp OR direct-endoscopic-vis\* OR direct-endoscopic-place\* OR direct-endoscopic-control\*

-----

Malignant-dysphagia\* OR ((aphagopraxia\* OR deglutition-disorder\* OR dysphagia\* OR swallowing-disorder\* OR "Deglutition Disorders"[Mesh] ) AND (esophagus-cancer\* OR esophagus-neoplasm\* OR esophageal-cancer\* OR esophageal-neoplasm\* OR "Esophageal Neoplasms"[Mesh]))

AND

Esophag\* OR "Esophagus"[Mesh]

AND

Stent\* OR "Stents"[Mesh]

AND

Fluoroscop\* OR "Fluoroscopy"[Mesh] OR direct-endoscopic-vis\* OR direct-endoscopic-place\* OR direct-endoscopic-control\*

**Appendix B** MOOSE checklist.

From: Stroup DF, Berlin JA, Morton SC et al. for the Meta-analysis Of Observational Studies in Epidemiology (MOOSE) Group. Meta-analysis of Observational Studies in Epidemiology. A Proposal for Reporting. JAMA. 2000;283(15):2008-2012. doi: 10.1001/jama.283.15.2008

### MOOSE (Meta-analyses Of Observational Studies in Epidemiology) Checklist

A reporting checklist for Authors, Editors, and Reviewers of Meta-analyses of Observational Studies. You must report the page number in your manuscript where you consider each of the items listed in this checklist. If you have not included this information, either revise your manuscript accordingly before submitting or note N/A.

| Reporting Criteria                                                                                              | Reported (Yes/No) | Reported on Page No. |
|-----------------------------------------------------------------------------------------------------------------|-------------------|----------------------|
| <b>Reporting of Background</b>                                                                                  |                   |                      |
| Problem definition                                                                                              | Yes               | 4                    |
| Hypothesis statement                                                                                            | Yes               | 4                    |
| Description of Study Outcome(s)                                                                                 | Yes               | 6                    |
| Type of exposure or intervention used                                                                           | Yes               | 5                    |
| Type of study design used                                                                                       | Yes               | 5                    |
| Study population                                                                                                | Yes               | 5                    |
| <b>Reporting of Search Strategy</b>                                                                             |                   |                      |
| Qualifications of searchers (eg, librarians and investigators)                                                  | Yes               | 12                   |
| Search strategy, including time period included in the synthesis and keywords                                   | Yes               | 5                    |
| Effort to include all available studies, including contact with authors                                         | Yes               | 5                    |
| Databases and registries searched                                                                               | Yes               | 5                    |
| Search software used, name and version, including special features used (eg, explosion)                         | Yes               | 7                    |
| Use of hand searching (eg, reference lists of obtained articles)                                                | Yes               | 5                    |
| List of citations located and those excluded, including justification                                           | Yes               | 7                    |
| Method for addressing articles published in languages other than English                                        | Yes               | 7                    |
| Method of handling abstracts and unpublished studies                                                            | Yes               | 5                    |
| Description of any contact with authors                                                                         | Yes               | 5                    |
| <b>Reporting of Methods</b>                                                                                     |                   |                      |
| Description of relevance or appropriateness of studies assembled for assessing the hypothesis to be tested      | No                |                      |
| Rationale for the selection and coding of data (eg, sound clinical principles or convenience)                   | No                |                      |
| Documentation of how data were classified and coded (eg, multiple raters, blinding, and interrater reliability) | No                |                      |
| Assessment of confounding (eg, comparability of cases and controls in studies where appropriate)                | No                |                      |



| Reporting Criteria                                                                                                                                                                                                                                                           | Reported (Yes/No) | Reported on Page No. |
|------------------------------------------------------------------------------------------------------------------------------------------------------------------------------------------------------------------------------------------------------------------------------|-------------------|----------------------|
| Assessment of study quality, including blinding of quality assessors; stratification or regression on possible predictors of study results                                                                                                                                   | Yes               | 6                    |
| Assessment of heterogeneity                                                                                                                                                                                                                                                  | Yes               | 8                    |
| Description of statistical methods (eg, complete description of fixed or random effects models, justification of whether the chosen models account for predictors of study results, dose-response models, or cumulative meta-analysis) in sufficient detail to be replicated | Yes               | 6                    |
| Provision of appropriate tables and graphics                                                                                                                                                                                                                                 | Yes               | 18                   |
| <b>Reporting of Results</b>                                                                                                                                                                                                                                                  |                   |                      |
| Table giving descriptive information for each study included                                                                                                                                                                                                                 | Yes               | 18                   |
| Results of sensitivity testing (eg, subgroup analysis)                                                                                                                                                                                                                       | Yes               | 18                   |
| Indication of statistical uncertainty of findings                                                                                                                                                                                                                            | Yes               | 18                   |
| <b>Reporting of Discussion</b>                                                                                                                                                                                                                                               |                   |                      |
| Quantitative assessment of bias (eg, publication bias)                                                                                                                                                                                                                       | Yes               | 9                    |
| Justification for exclusion (eg, exclusion of non-English-language citations)                                                                                                                                                                                                | No                |                      |
| Assessment of quality of included studies                                                                                                                                                                                                                                    | Yes               | 9                    |
| <b>Reporting of Conclusions</b>                                                                                                                                                                                                                                              |                   |                      |
| Consideration of alternative explanations for observed results                                                                                                                                                                                                               | No                |                      |
| Generalization of the conclusions (ie, appropriate for the data presented and within the domain of the literature review)                                                                                                                                                    | Yes               | 11                   |
| Guidelines for future research                                                                                                                                                                                                                                               | Yes               | 12                   |
| Disclosure of funding source                                                                                                                                                                                                                                                 | Yes               | 2                    |

► **Supplementary Table S1** Study and population characteristics.

| Author            | Study design                                                         | Insertion technique | Pre-insertion Dilation | # Patients | # Stents | Technical success | Clinical success | Stent type                                    | Stent length (cm)                          | Age (years)           | M   | F   | Dysphagia duration | Dysphagia deverity |      |     | Obst length | Tumor location |       |             | Median survival (days) | Stent A/E |             |              | Proc Time | AE          |                                        |                  |                                                                                                                 |                                                                                                                          |                                        |
|-------------------|----------------------------------------------------------------------|---------------------|------------------------|------------|----------|-------------------|------------------|-----------------------------------------------|--------------------------------------------|-----------------------|-----|-----|--------------------|--------------------|------|-----|-------------|----------------|-------|-------------|------------------------|-----------|-------------|--------------|-----------|-------------|----------------------------------------|------------------|-----------------------------------------------------------------------------------------------------------------|--------------------------------------------------------------------------------------------------------------------------|----------------------------------------|
|                   |                                                                      |                     |                        |            |          |                   |                  |                                               |                                            |                       |     |     |                    | None               | Mild | Mod |             | Severe         | U 1/3 | M 1/3       |                        | L 1/3     | Migration   | Over-growth  |           | Perforation | Others                                 | Early (<30 days) | Late (>30 days)                                                                                                 |                                                                                                                          |                                        |
| Austin, 2001      | Single-center, prospective, NR, United Kingdom                       | Side-by-side        | 10mm (Savory)          | 30         | 30       | 23/30             | 23/30 (4w)       | Ultraflex (prox release)                      | 9 n (7cm), 12 n (10cm), 2 n (15cm)         | 72 (43–86)            | 21  | 9   | NR                 | NR                 | NR   | NR  | NR          | NR             | NR    | NR          | NR                     | NR        | NR          | NR           | NR        | NR          | No major complications occurred (30 d) | –                |                                                                                                                 |                                                                                                                          |                                        |
| Almond, 2017      | Single-center, retrospective, 2003 and 2014, United Kingdom          | Side-by-side        | TTS (10–12 mm)         | 362        | 465      | 361/362           | NR               | NR                                            | 122 n (<12 cm), 105 (12 cm), 72 n (>12 cm) | 76 (IQR 66–83)        | 252 | 110 | NR                 | NR                 | NR   | NR  | 6 (5–90)    | 13             | 92    | 257         | 128                    | 13        | 8           | 3            | –         | NR          | 49 deaths                              | –                |                                                                                                                 |                                                                                                                          |                                        |
| Balekurduru, 2019 | Multicenter (2), retrospective, 2014 to 2017, India.                 | Guide-wire          | 11 mm (CRE)            | 78         | 83       | 78/78             | 52/61            | Ultraflex                                     | 10, 12, 15 cm                              | 64 ± 10.1             | 59  | 19  | 2 ± 1.6            | NR                 | NR   | NR  | 6           | 11             | 61    | 5.94 ± 2.94 | 7                      | 46        | 25          | 141 (41–360) | 0         | 0           | 0                                      | –                | NR                                                                                                              | 58 RS pain, 9 resp distress, 2 asp pna                                                                                   |                                        |
| Ben Sousan, 2005  | Single-center, prospective, Oct 2002 to Jun 2004, France.            | Side-by-side        | 11 mm (Savory)         | 33         | 38       | 30/33             | 30/33 (48H)      | Ultraflex                                     | 12 n (10 cm), 17 n (12 cm), 9 n (15 cm)    | 68.2 (47–92)          | 22  | 11  | NR                 | NR                 | NR   | NR  | NR          | NR             | NR    | NR          | NR                     | NR        | NR          | NR           | NR        | NR          | NR                                     | NR               | 1 persistent GERD, 2 severe retrosternal pain, 1 death (PE), 1 food impaction, 1 esophageo-respiratory fistula. |                                                                                                                          |                                        |
| Ferreira, 2011    | Single-center, retrospective, Jan 2005 to Jan 2010, Portugal.        | Side-by-side        | 12mm (Savory)          | 60         | 60       | 59/60             | NR               | Choostent, Hanarostent, Ultraflex, Wallstents | 8 cm to 14 cm                              | 61 (36–87)            | 45  | 15  | NR                 | NR                 | NR   | NR  | –           | 60n            | NR    | 9           | 27                     | 24        | 106 (6–366) | 7            | 0         | 0           | –                                      | NR               | 15 pain, 9 vomiting, 3 dysphagia, 2 hemorrhage, 4 malposition/migration, 9 death                                | 3 tumor ingrowth, 7 tumor overgrowth, 8 food impaction, 2 hemorrhage, 4 fistulae, 15 esophagitis, 8 prosthesis migration |                                        |
| García-Cano, 2016 | Single-center, Spain                                                 | Side-by-side        | 8–10 mm (Savory)       | 35         | 35       | 35/35             | NR               | Ultraflex                                     | 20 n (10 cm), 11 n (12 cm), 5 n (15 cm)    | NR                    | NR  | NR  | NR                 | NR                 | NR   | NR  | NR          | NR             | NR    | NR          | NR                     | NR        | NR          | NR           | NR        | NR          | NR                                     | NR               | NR                                                                                                              |                                                                                                                          |                                        |
| Govender, 2015    | Single-center, retrospective, 2007–2011, South Africa.               | Side-by-side        | 12mm (Savory)          | 453        | 480      | 410/453           | NR               | Ultraflex                                     | NR                                         | 60 (38–101)           | 268 | 185 | NR                 | NR                 | NR   | NR  | NR          | NR             | NR    | NR          | NR                     | NR        | 15          | 26           | 0         | 1           | Blocked stent, 1 perforation           | –                | –                                                                                                               |                                                                                                                          |                                        |
| Jain, 2016        | Single-center, retrospective, Apr 2012 to Mar 2016, India.           | Side-by-side        | 9mm (Savory)           | 110        | 110      | 110/110           | NR               | Ultraflex                                     | 20 n (10 cm), 60 n (12 cm), 30 n (15 cm)   | 57.38 ± 21.21 (31–84) | 62  | 48  | NR                 | NR                 | NR   | NR  | NR          | NR             | NR    | NR          | NR                     | NR        | NR          | NR           | NR        | NR          | NR                                     | NR               | NR                                                                                                              | 22 RS pain, 6 hematemesis                                                                                                |                                        |
| Kini, 2018        | Single-center, retrospective, January 2012 and September 2016, India | Guide-wire          | No                     | 16         | 16       | 16/16             | NR               | Niti-5, Ultraflex, Endotech-nik               | NR                                         | 56.6 ± 13.3           | 13  | 3   | NR                 | NR                 | NR   | NR  | NR          | NR             | NR    | NR          | NR                     | NR        | NR          | NR           | NR        | NR          | NR                                     | NR               | NR                                                                                                              | 4 chest pain, 3 nausea/vomiting, 3 GERD                                                                                  |                                        |
| Lazaraki, 2011    | Single-center, retrospective, Jan 2003 to Jun 2008, Greece.          | Side-by-side        | 10mm (Savory)          | 89         | 83       | 83/89             | 82/83            | Ultraflex                                     | 15 (10 cm), 22 (12 cm), 52 (15 cm)         | 69.54 ± 7.1           | 73  | 16  | NR                 | NR                 | NR   | NR  | NR          | NR             | NR    | NR          | NR                     | NR        | NR          | NR           | NR        | NR          | NR                                     | NR               | NR                                                                                                              | NR                                                                                                                       | 37 Retrosternal pain, 21 GERD, 1 fever |
| Saigram, 2017     | Single-center, retrospective, Jan 2010 to Jun 2015, USA.             | Side-by-side        | 9–12 mm (Savory)       | 172        | 280      | 164/172           | NR               | Ali-maxx-ES                                   | 9 cm (4–12)                                | 66 ± 9                | 40  | 132 | NR                 | NR                 | NR   | NR  | NR          | NR             | NR    | NR          | NR                     | NR        | 10          | NR           | 0         | –           | NR                                     | NR               | NR                                                                                                              | 12 Stent misplacement                                                                                                    |                                        |
| Sharma, 2012      | Single-center, March 2010 to January 2012, India                     | Side-by-side        | 8mm (American)         | 13         | 13       | 12/13             | 13/13            | Ultraflex                                     | NR                                         | NR                    | NR  | NR  | NR                 | NR                 | NR   | NR  | NR          | NR             | NR    | NR          | NR                     | NR        | NR          | NR           | NR        | NR          | NR                                     | NR               | NR                                                                                                              | NR                                                                                                                       | 7 chest pain, 2 reflux                 |

► Supplementary Table S1 (Continuation)

| Author          | Study design                                                 | Insertion technique | Pre-insertion Dilation | # Patients | # Stents | Technical success | Clinical success      | Stent type                                                    | Stent length (cm)                                   | Age (years)   | M  | F  | Dysphagia duration | Dysphagia deverity |             |              |              | Obst length  | Tumor location |       |          | Median survival (days) | Stent A/E |            | Proc Time | AE                 |                                                                                                                                                  |                                                                                         |
|-----------------|--------------------------------------------------------------|---------------------|------------------------|------------|----------|-------------------|-----------------------|---------------------------------------------------------------|-----------------------------------------------------|---------------|----|----|--------------------|--------------------|-------------|--------------|--------------|--------------|----------------|-------|----------|------------------------|-----------|------------|-----------|--------------------|--------------------------------------------------------------------------------------------------------------------------------------------------|-----------------------------------------------------------------------------------------|
|                 |                                                              |                     |                        |            |          |                   |                       |                                                               |                                                     |               |    |    |                    | None               | Mild        | Mod          | Severe       |              | U 1/3          | M 1/3 | L 1/3    |                        | Migration | Overgrowth |           | Perforation        | Others                                                                                                                                           | Early (<30 days)                                                                        |
| Siddiqui, 2010  | Single-center, prospective, Apr 2006 to Mar 2009, Pakistan.  | Side-by-side        | 11 mm (Savory)         | 80         | 75       | 75/80             | NR                    | Covered nitinol stent with distal release                     | NR                                                  | 52.33±14.53   | 35 | 45 | 3.86±3.25          | NR                 | NR          | NR           | NR           | NR           | NR             | NR    | NR       | NR                     | 0         | NR         | 0         | –                  | 30 RS pain, 4 UGIB, 4 asp                                                                                                                        | –                                                                                       |
| Tahiri, 2015    | Single-center, retrospective, May 2009 to May 2011, Canada.  | Side-by-side        | N                      | 47         | 47       | 47/47             | NR                    | Wallflex and Evolution                                        | 10 to 15 cm                                         | 70.4±9.6      | 38 | 9  | NR                 | NR                 | NR          | NR           | 8.1±3.0      | 5            | 22             | 20    | 146±26.5 | 0                      | 4         | 0          | –         | 4 tumor overgrowth | –                                                                                                                                                |                                                                                         |
| Vermeulen, 2019 | Multicenter, prospective, Apr 2017 to Aug 2018, Netherlands. | TTS                 | NR                     | 32         | 33       | 10/33             | 24/28                 | Nitinol fcSEMS (BCM Co)                                       | 12 n (10 cm), 9 n (12 cm), 12 n (15 cm)             | 68±11         | 20 | 12 | NR                 | NR                 | –           | 6            | 18           | 8            | 7              | 7     | 18       | 42 (28–91)             | 5         | 4          | 0         | –                  | 29 serious/32 AE, 21 Retrosternal pain, 9 Mild nausea/vomiting, 1 GERD, 1 Anemia, 2 Hemorrhage, 2 (Aspiration) pneumonia, 1 Tracheal compression | –                                                                                       |
| White, 2001     | Single-center, prospective, Aug 1999 to Aug 2000, Kenya      | Side-by-side        | Y                      | 70         | 70       | 70/70             | 32/70 (1 m follow up) | Wall stent (n = 30) Ultraflex (n = 40) distal or prox release | 5 to 15 cm                                          | 63 (39 to 85) | 43 | 27 | NR                 | NR                 | NR          | NR           | NR           | NR           | NR             | NR    | NR       | NR                     | 0         | 1          | 2         | –                  | 2 perforations, 2 tumor ingrowth, 1 tumor overgrowth                                                                                             | –                                                                                       |
| Wilkes, 2007    | Single-center, retrospective, 5 yrs, United Kingdom.         | Side-by-side        | TTS (12–13.5 mm)       | 98         | 118      | 90/98             | 57/98                 | Ultraflex (prox release)                                      | 10 n (7 cm), 20 n (10 cm), 2 n (12 cm), 5 n (15 cm) | 75 (42–92)    | 62 | 36 | NR                 | NR                 | 1 (grade 1) | 11 (grade 2) | 57 (grade 3) | 29 (grade 4) | 8              | 23    | 43       | 100±18.4 (4–921)       | 3         | 25         | 0         | –                  | 10 Death, 4 Pain, 2 Vomiting, 5 Recurrence of dysphagia                                                                                          | 25 tumor overgrowth, 6 hemorrhage, 5 tracheoesophageal fistula, 13 Food bolus occlusion |
